# Supplementary material for: First Proteomic Approach to Identify Cell Death Biomarkers in Wine Yeasts during Sparkling Wine Production
Source: MDPI journal article supplement (doi:10.3390/microorganisms7110542), 2019-11-08
Supplement: s1 [file s1]

Table S2. List of the most relevant autolysis-related proteins identified in *S. cerevisiae* P29 and G1 under each study condition (PC: pressure condition, NPC: non-pressure condition) and sampling time (T1: middle of the second fermentation, T2: one month after it). Proteins showing high content are highlighted in bold. a-g Different superscript letters indicate significant differences of protein content in each condition at 0.05 level according to Fisher's least significant difference procedure. Proteins showing 4-8 homogeneous groups (HG) are marked with an asterisk \*. n.f.; not found. ns.; not significant.

| Condition     |                                    | PCT1              |                 |        |       | PCT2   |       |        |      | NPCT1   |       |         |       | NPCT2   |       |         |        |
|---------------|------------------------------------|-------------------|-----------------|--------|-------|--------|-------|--------|------|---------|-------|---------|-------|---------|-------|---------|--------|
| Strain        |                                    | P29               |                 | G1     |       | P29    |       | G1     |      | P29     |       | G1      |       | P29     |       | G1      |        |
| Protein       | Molecular function                 | <sup>h</sup> mol% | <sup>i</sup> SD | mol%   | SD    | mol%   | SD    | mol%   | SD   | mol%    | SD    | mol%    | SD    | mol%    | SD    | mol%    | SD     |
| Aap1p         | Alanine/arginine aminopeptidase    | 0.011a            | 0.005           | 0.031b | 0.006 | n.f.a  |       | n.f.a  |      | 0.07c   | 0.04  | 0.05bc  | 0.01  | n.f.a   |       | 0.0391b | 0.0007 |
| Ai4p          | Intron-encoded DNA endonuclease    | n.f.a             |                 | n.f.a  |       | n.f.a  |       | n.f.a  |      | 0.014b  | 0.007 | 0.015b  | 0.005 | n.f.a   |       | n.f.a   |        |
| Ai5_Alphap    | Intron-encoded DNA endonuclease    | n.f.ns            |                 | n.f.ns |       | n.f.ns |       | n.f.ns |      | n.f.ns  |       | 0.011ns | 0.008 | n.f.ns  |       | n.f.ns  |        |
| Ams1p         | Alpha-mannosidase                  | n.f.a             |                 | n.f.a  |       | 0.022b | 0.001 | n.f.a  |      | 0.05c   | 0.02  | n.f.a   |       | n.f.a   |       | n.f.a   |        |
| <b>Ape1p*</b> | Vacuolar aminopeptidase 1          | 0.107c            | 0.004           | 0.16d  | 0.01  | 0.15d  | 0.02  | n.f.a  |      | 0.098c  | 0.003 | 0.05b   | 0.03  | 0.183de | 0.005 | 0.22e   | 0.04   |
| <b>Ape2p*</b> | Aminopeptidase 2, mitochondrial    | 0.009a            | 0.006           | 0.07c  | 0.02  | n.f.ab |       | n.f.ab |      | 0.06c   | 0.03  | 0.02b   | 0.01  | n.f.ab  |       | 0.11d   | 0.01   |
| <b>Ape3p*</b> | Aminopeptidase Y                   | 0.081b            | 0.001           | 0.24d  | 0.03  | 0.22d  | 0.05  | n.f.a  |      | 0.083b  | 0.001 | 0.14c   | 0.04  | 0.30e   | 0.03  | 0.20d   | 0.01   |
| Ape4p         | Aspartyl aminopeptidase 4          | n.f.a             |                 | n.f.a  |       | n.f.a  |       | n.f.a  |      | 0.019b  | 0.007 | 0.014b  | 0.007 | n.f.a   |       | n.f.a   |        |
| Arx1p         | Probable metalloprotease           | n.f.a             |                 | n.f.a  |       | n.f.a  |       | n.f.a  |      | 0.05b   | 0.02  | n.f.a   |       | n.f.a   |       | n.f.a   |        |
| Atg4p         | Cysteine protease                  | n.f.a             |                 | n.f.a  |       | n.f.a  |       | n.f.a  |      | 0.04c   | 0.01  | 0.02b   | 0.01  | n.f.a   |       | n.f.a   |        |
| Axl1p         | Putative protease                  | n.f.ns            |                 | n.f.ns |       | n.f.ns |       | n.f.ns |      | 0.006ns | 0.001 | 0.004ns | 0.002 | n.f.ns  |       | n.f.ns  |        |
| <b>Bgl2p*</b> | Glucan 1,3-beta-glucosidase        | 0.36b             | 0.04            | 0.239a | 0.005 | 1.0c   | 0.1   | 1.31d  | 0.02 | 0.26a   | 0.05  | 0.242a  | 0.003 | 1.3d    | 0.1   | 1.28d   | 0.01   |
| Cps1p         | Carboxypeptidase S                 | 0.02a             | 0.01            | 0.08b  | 0.01  | n.f.a  |       | n.f.a  |      | 0.09b   | 0.05  | 0.06b   | 0.01  | n.f.a   |       | n.f.a   |        |
| Cym1p         | Mitochondrial presequence protease | n.f.ns            |                 | n.f.ns |       | n.f.ns |       | n.f.ns |      | 0.006ns | 0.004 | 0.004ns | 0.003 | n.f.ns  |       | n.f.ns  |        |
| Dap2p         | Dipeptidyl aminopeptidase B        | n.f.ns            |                 | n.f.ns |       | n.f.ns |       | n.f.ns |      | 0.012ns | 0.009 | 0.006ns | 0.004 | n.f.ns  |       | n.f.ns  |        |
| Dcw1p         | Mannan endo-1,6-alpha-mannosidase  | n.f.a             |                 | n.f.a  |       | n.f.a  |       | n.f.a  |      | 0.04b   | 0.02  | 0.03b   | 0.01  | n.f.a   |       | n.f.a   |        |

|               |                                                  |         |       |         |        |        |       |         |       |         |       |         |        |        |       |         |       |
|---------------|--------------------------------------------------|---------|-------|---------|--------|--------|-------|---------|-------|---------|-------|---------|--------|--------|-------|---------|-------|
| Dfg5p         | Mannan endo-1,6-alpha-mannosidase                | n.f.a   |       | n.f.a   |        | n.f.a  |       | n.f.a   |       | 0.03c   | 0.01  | 0.02b   | 0.01   | n.f.a  |       | n.f.a   |       |
| Dna2p         | ATP-dependent helicase/nuclease                  | 0.007b  | 0.002 | n.f.a   |        | n.f.a  |       | n.f.a   |       | n.f.a   |       | n.f.a   |        | n.f.a  |       | n.f.a   |       |
| Dse4p         | Endo-1,3(4)-beta-glucanase 1                     | 0.05a   | 0.02  | n.f.a   |        | n.f.a  |       | n.f.a   |       | 0.16b   | 0.07  | 0.05a   | 0.04   | n.f.a  |       | 0.11b   | 0.01  |
| Dss1p         | Exoribonuclease II, mitochondrial                | n.f.ns  |       | n.f.ns  |        | n.f.ns |       | n.f.ns  |       | 0.004ns | 0.003 | 0.004ns | 0.003  | n.f.ns |       | n.f.ns  |       |
| <b>Dug1p*</b> | Cys-Gly metallodipeptidase                       | 0.225cd | 0.007 | 0.25d   | 0.05   | 0.04a  | 0.02  | n.f.a   |       | 0.14b   | 0.03  | 0.17bc  | 0.02   | 0.20cd | 0.02  | 0.8e    | 0.1   |
| Dug2p         | Probable di- and tripeptidase                    | n.f.a   |       | n.f.a   |        | n.f.a  |       | n.f.a   |       | 0.02b   | 0.01  | n.f.a   |        | n.f.a  |       | n.f.a   |       |
| Ecm14p        | Putative metallocarboxypeptidase                 | n.f.a   |       | n.f.a   |        | n.f.a  |       | n.f.a   |       | 0.013b  | 0.004 | n.f.a   |        | n.f.a  |       | n.f.a   |       |
| Ecm38p        | Gamma-glutamyltransferase                        | n.f.ns  |       | n.f.ns  |        | n.f.ns |       | n.f.ns  |       | 0.007ns | 0.005 | n.f.ns  |        | n.f.ns |       | n.f.ns  |       |
| Esp1p         | Separin                                          | n.f.ns  |       | 0.007ns | 0.004  | n.f.ns |       | n.f.ns  |       | 0.005ns | 0.002 | n.f.ns  |        | n.f.ns |       | n.f.ns  |       |
| <b>Exg1p*</b> | Glucan 1,3-beta-glucosidase I/II                 | 0.32c   | 0.02  | 0.25b   | 0.02   | 0.18a  | 0.05  | 1.0f    | 0.1   | 0.258bc | 0.004 | 0.20ab  | 0.02   | 0.42d  | 0.06  | 0.80e   | 0.07  |
| Exg2p         | Glucan 1,3-beta-glucosidase 2                    | n.f.a   |       | 0.03c   | 0.01   | n.f.a  |       | n.f.a   |       | 0.015b  | 0.006 | 0.010b  | 0.004  | n.f.a  |       | n.f.a   |       |
| Fra1p         | Putative Xaa-Pro aminopeptidase                  | 0.013c  | 0.001 | n.f.a   |        | n.f.a  |       | n.f.a   |       | 0.009b  | 0.003 | n.f.a   |        | n.f.a  |       | n.f.a   |       |
| Lap2p         | Leukotriene A-4 hydrolase homolog                | n.f.a   |       | 0.0157b | 0.0002 | n.f.a  |       | n.f.a   |       | 0.03c   | 0.02  | 0.0167b | 0.0004 | n.f.a  |       | n.f.a   |       |
| Lap3p         | Cysteine proteinase 1, mitochondrial             | n.f.a   |       | 0.05b   | 0.01   | n.f.a  |       | n.f.a   |       | 0.06b   | 0.03  | 0.019a  | 0.007  | n.f.a  |       | n.f.a   |       |
| <b>Map1p</b>  | Methionine aminopeptidase 1                      | 0.22b   | 0.08  | n.f.a   |        | n.f.a  |       | n.f.a   |       | 0.5c    | 0.1   | 0.17b   | 0.09   | n.f.a  |       | n.f.a   |       |
| Mas1p         | Mitochondrial-processing peptidase subunit beta  | n.f.a   |       | 0.06c   | 0.01   | n.f.a  |       | n.f.a   |       | 0.015a  | 0.007 | 0.03b   | 0.02   | n.f.a  |       | n.f.a   |       |
| <b>Mas2p</b>  | Mitochondrial-processing peptidase subunit alpha | n.f.a   |       | 0.06b   | 0.01   | n.f.a  |       | n.f.a   |       | 0.02a   | 0.01  | 0.017a  | 0.005  | n.f.a  |       | 0.13c   | 0.06  |
| <b>Mca1p*</b> | Metacaspase-1                                    | n.f.a   |       | n.f.a   |        | 0.11c  | 0.01  | n.f.a   |       | 0.05b   | 0.02  | 0.05b   | 0.02   | 0.137d | 0.008 | n.f.a   |       |
| Nma111p       | Pro-apoptotic serine protease                    | n.f.ns  |       | 0.02ns  | 0.01   | n.f.ns |       | n.f.ns  |       | 0.011ns | 0.006 | n.f.ns  |        | n.f.ns |       | n.f.ns  |       |
| Otu1p         | Ubiquitin thioesterase                           | n.f.a   |       | n.f.a   |        | n.f.a  |       | n.f.a   |       | 0.04b   | 0.02  | 0.018a  | 0.007  | n.f.a  |       | n.f.a   |       |
| <b>Pep4p*</b> | Saccharopepsin                                   | 0.46bc  | 0.02  | 0.42b   | 0.04   | 0.43b  | 0.01  | 1.6e    | 0.1   | 0.2a    | 0.1   | 0.31a   | 0.05   | 0.6c   | 0.1   | 1.1d    | 0.1   |
| Pim1p         | Lon protease homolog, mitochondrial              | n.f.a   |       | n.f.a   |        | n.f.a  |       | n.f.a   |       | 0.018c  | 0.004 | 0.006b  | 0.004  | n.f.a  |       | n.f.a   |       |
| Prb1p*        | Cerevisin                                        | 0.07cd  | 0.02  | 0.080de | 0.001  | 0.098f | 0.002 | 0.086ef | 0.003 | 0.050ab | 0.001 | 0.047a  | 0.002  | 0.12g  | 0.01  | 0.061bc | 0.001 |
| <b>Prc1p*</b> | Carboxypeptidase Y                               | 0.11b   | 0.02  | 0.19c   | 0.04   | n.f.a  |       | 0.9f    | 0.1   | 0.145b  | 0.005 | 0.30d   | 0.04   | n.f.a  |       | 0.71e   | 0.03  |
| Prd1p         | Saccharolysin                                    | 0.03b   | 0.02  | 0.04b   | 0.01   | n.f.a  |       | n.f.a   |       | 0.08c   | 0.01  | 0.018a  | 0.005  | n.f.a  |       | n.f.a   |       |
| Pre10p        | Probable proteasome subunit alpha type-7         | n.f.ns  |       | 0.11ns  | 0.08   | n.f.ns |       | n.f.ns  |       | 0.04ns  | 0.03  | n.f.ns  |        | n.f.ns |       | n.f.ns  |       |
| Pre1p         | Proteasome subunit beta type-4                   | n.f.ns  |       | n.f.ns  |        | n.f.ns |       | n.f.ns  |       | 0.07ns  | 0.04  | 0.04ns  | 0.02   | n.f.ns |       | n.f.ns  |       |

|               |                                                  |         |       |        |       |        |       |        |         |       |         |       |        |       |        |
|---------------|--------------------------------------------------|---------|-------|--------|-------|--------|-------|--------|---------|-------|---------|-------|--------|-------|--------|
| Pre2p         | Proteasome subunit beta type-5                   | n.f.a   |       | n.f.a  |       | n.f.a  | n.f.a | 0.06b  | 0.03    | n.f.a |         | n.f.a |        | n.f.a |        |
| <b>Pre3p</b>  | Proteasome subunit beta type-1                   | 0.16c   | 0.04  | 0.16c  | 0.01  | 0.092b | 0.004 | n.f.a  | 0.103b  | 0.006 | 0.09b   | 0.03  | n.f.a  | 0.16c | 0.01   |
| Pre4p         | Proteasome subunit beta type-7                   | n.f.a   |       | 0.06b  | 0.03  | n.f.a  |       | n.f.a  | 0.06b   | 0.04  | 0.024a  | 0.001 | n.f.a  | n.f.a |        |
| Pre5p*        | Proteasome subunit alpha type-6                  | 0.08c   | 0.03  | 0.07c  | 0.02  | n.f.a  |       | n.f.a  | 0.14d   | 0.02  | 0.037b  | 0.006 | n.f.a  | n.f.a |        |
| <b>Pre6p*</b> | Proteasome subunit alpha type-4                  | n.f.a   |       | 0.06c  | 0.01  | 0.07c  | 0.02  | n.f.a  | 0.101d  | 0.006 | 0.042b  | 0.002 | n.f.a  | n.f.a |        |
| <b>Pre7p</b>  | Proteasome subunit beta type-6                   | n.f.a   |       | n.f.a  |       | 0.2c   | 0.1   | n.f.a  | 0.06b   | 0.01  | 0.03ab  | 0.01  | n.f.a  | n.f.a |        |
| Pre8p*        | Proteasome subunit alpha type-2                  | 0.08b   | 0.02  | 0.08b  | 0.02  | 0.16d  | 0.03  | n.f.a  | 0.119c  | 0.003 | 0.11c   | 0.01  | 0.120c | 0.006 | n.f.a  |
| <b>Pre9p*</b> | Proteasome subunit alpha type-3                  | 0.145de | 0.001 | 0.16e  | 0.03  | 0.078c | 0.004 | n.f.a  | 0.133de | 0.002 | 0.125d  | 0.002 | 0.05b  | 0.02  | n.f.a  |
| Pup1p         | Proteasome subunit beta type-2                   | n.f.ns  |       | n.f.ns |       | n.f.ns |       | n.f.ns | 0.05ns  | 0.03  | 0.03ns  | 0.02  | n.f.ns |       | n.f.ns |
| <b>Pup2p</b>  | Proteasome subunit alpha type-5                  | 0.30c   | 0.04  | 0.171b | 0.003 | n.f.a  |       | n.f.a  | 0.19b   | 0.06  | 0.180b  | 0.005 | 0.08a  | 0.05  | n.f.a  |
| <b>Pup3p*</b> | Proteasome subunit beta type-3                   | 0.102d  | 0.007 | 0.072b | 0.004 | n.f.a  |       | n.f.a  | 0.14e   | 0.02  | 0.083c  | 0.002 | n.f.a  |       | n.f.a  |
| Rad2p         | DNA repair protein                               | n.f.ns  |       | n.f.ns |       | n.f.ns |       | n.f.ns | 0.004ns | 0.002 | n.f.ns  |       | n.f.ns |       | n.f.ns |
| Rai1p         | Decapping nuclease                               | n.f.ns  |       | n.f.ns |       | n.f.ns |       | n.f.ns | 0.009ns | 0.006 | n.f.ns  |       | n.f.ns |       | n.f.ns |
| Rex2p         | Oligoribonuclease, mitochondrial                 | n.f.a   |       | n.f.a  |       | n.f.a  |       | n.f.a  | 0.03b   | 0.01  | n.f.a   |       | n.f.a  |       | n.f.a  |
| Rny1p*        | Ribonuclease T2-like                             | n.f.a   |       | n.f.a  |       | 0.100e | 0.003 | n.f.a  | 0.016c  | 0.004 | 0.011b  | 0.004 | 0.08d  | 0.01  | n.f.a  |
| <b>Rpn11p</b> | Ubiquitin carboxyl-terminal hydrolase            | n.f.a   |       | n.f.a  |       | 0.04b  | 0.01  | n.f.a  | 0.07c   | 0.01  | n.f.a   |       | n.f.a  |       | n.f.a  |
| Scl1p         | Proteasome subunit alpha type-1                  | 0.05b   | 0.02  | 0.06b  | 0.01  | n.f.a  |       | n.f.a  | 0.11c   | 0.03  | 0.041ab | 0.001 | n.f.a  | 0.12c | 0.05   |
| Scw11p        | Probable family 17 glucosidase                   | n.f.ns  |       | n.f.ns |       | n.f.ns |       | n.f.ns | 0.05ns  | 0.03  | 0.05ns  | 0.03  | n.f.ns |       | n.f.ns |
| Sga1p         | Glucoamylase, intracellular sporulation-specific | n.f.a   |       | n.f.a  |       | n.f.a  |       | n.f.a  | n.f.a   |       | 0.03b   | 0.01  | n.f.a  |       | n.f.a  |
| Ste23p        | A-factor-processing enzyme                       | n.f.ns  |       | n.f.ns |       | n.f.ns |       | n.f.ns | 0.008ns | 0.005 | 0.004ns | 0.003 | n.f.ns |       | n.f.ns |
| <b>Ste24p</b> | CAAX prenyl protease 1                           | n.f.ns  |       | 0.03ns | 0.02  | n.f.ns |       | n.f.ns | n.f.ns  |       | n.f.ns  |       | n.f.ns |       | n.f.ns |
| Ubp12p        | Ubiquitin carboxyl-terminal hydrolase 12         | n.f.a   |       | n.f.a  |       | n.f.a  |       | n.f.a  | 0.03b   | 0.01  | 0.007a  | 0.005 | n.f.a  |       | n.f.a  |
| Ubp14p        | Ubiquitin carboxyl-terminal hydrolase 14         | n.f.ns  |       | n.f.ns |       | n.f.ns |       | n.f.ns | 0.014ns | 0.007 | n.f.ns  |       | n.f.ns |       | n.f.ns |
| Ubp15p        | Ubiquitin carboxyl-terminal hydrolase 15         | n.f.a   |       | n.f.a  |       | n.f.a  |       | n.f.a  | 0.04b   | 0.02  | 0.008a  | 0.004 | n.f.a  |       | n.f.a  |
| Ubp1p         | Ubiquitin carboxyl-terminal hydrolase 1          | n.f.ns  |       | n.f.ns |       | n.f.ns |       | n.f.ns | n.f.ns  |       | 0.006ns | 0.004 | n.f.ns |       | n.f.ns |
| Ubp2p         | Ubiquitin carboxyl-terminal hydrolase 2          | n.f.ns  |       | n.f.ns |       | n.f.ns |       | n.f.ns | 0.013ns | 0.004 | 0.007ns | 0.005 | n.f.ns |       | n.f.ns |
| Ubp3p         | Ubiquitin carboxyl-terminal hydrolase 3          | n.f.a   |       | n.f.a  |       | n.f.a  |       | n.f.a  | 0.012b  | 0.006 | n.f.a   |       | n.f.a  |       | n.f.a  |

|               |                                              |         |        |       |        |        |         |         |         |        |        |       |        |      |       |      |
|---------------|----------------------------------------------|---------|--------|-------|--------|--------|---------|---------|---------|--------|--------|-------|--------|------|-------|------|
| Ubp6p         | Ubiquitin carboxyl-terminal hydrolase 6      | n.f.a   | 0.018b | 0.007 | n.f.a  | n.f.a  | 0.04c   | 0.02    | n.f.a   | n.f.a  | n.f.a  |       |        |      |       |      |
| Ubp7p         | Ubiquitin carboxyl-terminal hydrolase 7      | n.f.a   | n.f.a  |       | n.f.a  | n.f.a  | 0.004b  | 0.002   | n.f.a   | n.f.a  | n.f.a  |       |        |      |       |      |
| Ulp2p         | Ubiquitin-like-specific protease 2           | n.f.ns  | n.f.ns |       | n.f.ns | n.f.ns | 0.004ns | 0.003   | n.f.ns  | n.f.ns | n.f.ns |       |        |      |       |      |
| <b>Vma1p*</b> | V-type proton ATPase catalytic subunit A     | 0.170bc | 0.007  | 0.3de | 0.1    | 0.33e  | 0.02    | n.f.a   | 0.169bc | 0.004  | 0.14b  | 0.04  | 0.21cd | 0.01 | 0.06a | 0.02 |
| Xrn1p         | 5'-3' exoribonuclease 1                      | n.f.a   | n.f.a  |       | n.f.a  | n.f.a  | 0.003b  | 0.001   | n.f.a   | n.f.a  | n.f.a  |       |        |      |       |      |
| Ybl055cp      | Deoxyribonuclease Tat-D                      | n.f.a   | 0.02b  | 0.01  | n.f.a  | n.f.a  | n.f.a   | n.f.a   | n.f.a   | n.f.a  | n.f.a  |       |        |      |       |      |
| Ybr139wp      | Putative serine carboxypeptidase             | n.f.a   | 0.04c  | 0.01  | n.f.a  | n.f.a  | 0.05c   | 0.02    | 0.015b  | 0.004  | n.f.a  | n.f.a |        |      |       |      |
| Yil108wp      | Putative zinc metalloproteinase              | n.f.a   | n.f.a  |       | n.f.a  | n.f.a  | 0.010b  | 0.005   | n.f.a   | n.f.a  | n.f.a  |       |        |      |       |      |
| Yol057wp      | Probable dipeptidyl peptidase 3              | n.f.ns  | n.f.ns |       | n.f.ns | n.f.ns | 0.03ns  | 0.02    | n.f.ns  | n.f.ns | n.f.ns |       |        |      |       |      |
| Yps1p         | Aspartic proteinase 3                        | n.f.a   | n.f.a  |       | n.f.a  | n.f.a  | 0.03b   | 0.01    | n.f.a   | n.f.a  | n.f.a  |       |        |      |       |      |
| Yps3p         | Aspartic proteinase yapsin-3                 | n.f.ns  | n.f.ns |       | n.f.ns | n.f.ns | 0.011ns | 0.008   | n.f.ns  | n.f.ns | n.f.ns |       |        |      |       |      |
| Yps7p         | Aspartic proteinase yapsin-7                 | n.f.ns  | n.f.ns |       | n.f.ns | n.f.ns | 0.03ns  | 0.02    | n.f.ns  | n.f.ns | n.f.ns |       |        |      |       |      |
| Yta12p        | Mitochondrial respiratory complexes assembly | n.f.ns  | n.f.ns |       | n.f.ns | n.f.ns | n.f.ns  | 0.004ns | 0.003   | n.f.ns | n.f.ns |       |        |      |       |      |
| Yuh1p         | Ubiquitin carboxyl-terminal hydrolase        | 0.109   | 0.002  | n.f.a | n.f.a  | n.f.a  | 0.1061  | 0.0003  | 0.07    | 0.04   | n.f.a  | n.f.a |        |      |       |      |

<sup>h</sup>Average values of protein content (mol %) and <sup>i</sup>standard deviation (SD).
