# Supplementary material for: First Proteomic Approach to Identify Cell Death Biomarkers in Wine Yeasts during Sparkling Wine Production
Source: MDPI journal article supplement (doi:10.3390/microorganisms7110542), 2019-11-08
Supplement: s1 [file s1]

Table S1. Average values of score and peptides detected in apoptosis and autolysis proteins in *S. cerevisiae* P29 and G1. Values identified in each study condition (PC: pressure condition and NPC: non-pressure condition) and each sampling time (T1: middle of the second fermentation and T2: one month after it). Score values were calculated by summing the Xcorr values of each peptide detected. n.f.; not found.

#### APOPTOSIS

| Condition | PCT1   |          |        |          | PCT2  |          |        |          | NPCT1  |          |        |          | NPCT2  |          |        |          |
|-----------|--------|----------|--------|----------|-------|----------|--------|----------|--------|----------|--------|----------|--------|----------|--------|----------|
| Strain    | P29    |          | G1     |          | P29   |          | G1     |          | P29    |          | G1     |          | P29    |          | G1     |          |
| Protein   | Score  | Peptides | Score  | Peptides | Score | Peptides | Score  | Peptides | Score  | Peptides | Score  | Peptides | Score  | Peptides | Score  | Peptides |
| Bir1p     | n.f.   | n.f.     | n.f.   | n.f.     | n.f.  | n.f.     | n.f.   | n.f.     | n.f.   | n.f.     | 2.49   | 3        | n.f.   | n.f.     | n.f.   | n.f.     |
| Cpr3p     | 16.64  | 4        | 116.93 | 9        | 13.18 | 3        | n.f.   | n.f.     | 73.96  | 7        | 99.71  | 8        | 40.82  | 7        | 7.51   | 2        |
| Esp1p     | n.f.   | n.f.     | 3.20   | 2        | n.f.  | n.f.     | n.f.   | n.f.     | 5.19   | 4        | n.f.   | n.f.     | n.f.   | n.f.     | n.f.   | n.f.     |
| Fis1p     | n.f.   | n.f.     | n.f.   | n.f.     | n.f.  | n.f.     | n.f.   | n.f.     | 6.44   | 2        | n.f.   | n.f.     | 10.67  | 4        | n.f.   | n.f.     |
| Mca1p     | n.f.   | n.f.     | n.f.   | n.f.     | 17.16 | 3        | n.f.   | n.f.     | 14.00  | 4        | 8.09   | 4        | 3.63   | 4        | n.f.   | n.f.     |
| Nma111p   | n.f.   | n.f.     | 4.60   | 4        | n.f.  | n.f.     | n.f.   | n.f.     | 8.58   | 5        | n.f.   | n.f.     | n.f.   | n.f.     | n.f.   | n.f.     |
| Oye2p     | 44.57  | 19       | 191.70 | 23       | 107.6 | 21       | n.f.   | n.f.     | 216.09 | 22       | 65.17  | 19       | 10.85  | 8        | n.f.   | n.f.     |
| Oye3p     | n.f.   | n.f.     | n.f.   | n.f.     | n.f.  | n.f.     | n.f.   | n.f.     | 27.08  | 7        | 8.17   | 2        | 5.98   | 5        | 28.51  | 9        |
| Por1p     | n.f.   | n.f.     | n.f.   | n.f.     | 122.6 | 14       | n.f.   | n.f.     | 34.41  | 8        | 8.78   | 2        | 62.13  | 10       | 6.49   | 2        |
| Rny1p     | n.f.   | n.f.     | n.f.   | n.f.     | 18.58 | 6        | n.f.   | n.f.     | 6.84   | 3        | 9.82   | 2        | 18.65  | 5        | n.f.   | n.f.     |
| Tdh2p     | 302.38 | 31       | 627.55 | 34       | 527.6 | 32       | 335.89 | 24       | 663.28 | 37       | 688.35 | 38       | 316.2  | 38       | 261.56 | 21       |
| Tdh3p     | 282.63 | 33       | 706.64 | 38       | 549.2 | 35       | 336.58 | 24       | 635.62 | 36       | 699.78 | 39       | 283.51 | 38       | 263.41 | 22       |
| Ysp2p     | n.f.   | n.f.     | n.f.   | n.f.     | n.f.  | n.f.     | n.f.   | n.f.     | 2.06   | 2        | n.f.   | n.f.     | n.f.   | n.f.     | n.f.   | n.f.     |

#### AUTOLYSIS

| Condition | PCT1  |          |       |          | PCT2  |          |       |          | NPCT1 |          |       |          | NPCT2 |          |       |          |
|-----------|-------|----------|-------|----------|-------|----------|-------|----------|-------|----------|-------|----------|-------|----------|-------|----------|
| Strain    | P29   |          | G1    |          |
| Protein   | Score | Peptides |
| Aap1p     | 4.02  | 2        | 20.40 | 5        | n.f.  | n.f.     | n.f.  | n.f.     | 49.47 | 25       | 52.32 | 19       | n.f.  | n.f.     | 3.21  | 2        |

|            |       |      |        |      |       |      |        |      |        |      |        |      |       |      |       |      |
|------------|-------|------|--------|------|-------|------|--------|------|--------|------|--------|------|-------|------|-------|------|
| Ai4p       | n.f.  | n.f. | n.f.   | n.f. | n.f.  | n.f. | n.f.   | n.f. | 2.33   | 3    | 2.09   | 2    | n.f.  | n.f. | n.f.  | n.f. |
| Ai5_Alphap | n.f.  | n.f. | n.f.   | n.f. | n.f.  | n.f. | n.f.   | n.f. | n.f.   | n.f. | 2.03   | 2    | n.f.  | n.f. | n.f.  | n.f. |
| Ams1p      | n.f.  | n.f. | n.f.   | n.f. | 12.52 | 4    | n.f.   | n.f. | 107.36 | 24   | n.f.   | n.f. | n.f.  | n.f. | n.f.  | n.f. |
| Ape1p      | 16.94 | 10   | 48.42  | 13   | 44.87 | 10   | n.f.   | n.f. | 68.70  | 19   | 31.53  | 11   | 30.21 | 13   | 17.40 | 6    |
| Ape2p      | 2.33  | 2    | 53.22  | 15   | n.f.  | n.f. | n.f.   | n.f. | 80.10  | 28   | 33.12  | 11   | n.f.  | n.f. | 22.38 | 7    |
| Ape3p      | 15.39 | 7    | 154.71 | 17   | 157.8 | 13   | n.f.   | n.f. | 73.88  | 15   | 91.06  | 23   | 44.97 | 18   | 15.37 | 5    |
| Ape4p      | n.f.  | n.f. | n.f.   | n.f. | n.f.  | n.f. | n.f.   | n.f. | 10.93  | 4    | 9.11   | 3    | n.f.  | n.f. | n.f.  | n.f. |
| Arx1p      | n.f.  | n.f. | n.f.   | n.f. | n.f.  | n.f. | n.f.   | n.f. | 40.73  | 11   | n.f.   | n.f. | n.f.  | n.f. | n.f.  | n.f. |
| Atg4p      | n.f.  | n.f. | n.f.   | n.f. | n.f.  | n.f. | n.f.   | n.f. | 22.16  | 6    | 14.50  | 3    | n.f.  | n.f. | n.f.  | n.f. |
| Axl1p      | n.f.  | n.f. | n.f.   | n.f. | n.f.  | n.f. | n.f.   | n.f. | 3.17   | 3    | 2.29   | 2    | n.f.  | n.f. | n.f.  | n.f. |
| Bgl2p      | 30.33 | 9    | 40.10  | 6    | 39.39 | 15   | 96.61  | 7    | 90.62  | 13   | 117.45 | 12   | 41.1  | 18   | 63.48 | 9    |
| Cps1p      | 3.12  | 2    | 20.79  | 6    | n.f.  | n.f. | n.f.   | n.f. | 59.13  | 15   | 53.54  | 10   | n.f.  | n.f. | n.f.  | n.f. |
| Cym1p      | n.f.  | n.f. | n.f.   | n.f. | n.f.  | n.f. | n.f.   | n.f. | 7.53   | 3    | 2.86   | 2    | n.f.  | n.f. | n.f.  | n.f. |
| Dap2p      | n.f.  | n.f. | n.f.   | n.f. | n.f.  | n.f. | n.f.   | n.f. | 7.21   | 4    | 2.42   | 2    | n.f.  | n.f. | n.f.  | n.f. |
| Dcw1p      | n.f.  | n.f. | n.f.   | n.f. | n.f.  | n.f. | n.f.   | n.f. | 15.51  | 3    | 11.99  | 2    | n.f.  | n.f. | n.f.  | n.f. |
| Dfg5p      | n.f.  | n.f. | n.f.   | n.f. | n.f.  | n.f. | n.f.   | n.f. | 6.61   | 3    | 4.01   | 2    | n.f.  | n.f. | n.f.  | n.f. |
| Dna2p      | 2.21  | 2    | n.f.   | n.f. | n.f.  | n.f. | n.f.   | n.f. | n.f.   | n.f. | n.f.   | n.f. | n.f.  | n.f. | n.f.  | n.f. |
| Dse4p      | 5.11  | 3    | n.f.   | n.f. | n.f.  | n.f. | n.f.   | n.f. | 106.24 | 18   | 35.03  | 7    | n.f.  | n.f. | 9.36  | 2    |
| Dss1p      | n.f.  | n.f. | n.f.   | n.f. | n.f.  | n.f. | n.f.   | n.f. | 6.44   | 2    | 4.37   | 2    | n.f.  | n.f. | n.f.  | n.f. |
| Dug1p      | 34.46 | 18   | 190.59 | 18   | 3.69  | 3    | n.f.   | n.f. | 83.99  | 24   | 100.93 | 27   | 15    | 13   | 55.60 | 18   |
| Dug2p      | n.f.  | n.f. | n.f.   | n.f. | n.f.  | n.f. | n.f.   | n.f. | 9.66   | 6    | n.f.   | n.f. | n.f.  | n.f. | n.f.  | n.f. |
| Ecm14p     | n.f.  | n.f. | n.f.   | n.f. | n.f.  | n.f. | n.f.   | n.f. | 4.47   | 2    | n.f.   | n.f. | n.f.  | n.f. | n.f.  | n.f. |
| Ecm38p     | n.f.  | n.f. | n.f.   | n.f. | n.f.  | n.f. | n.f.   | n.f. | 4.91   | 2    | n.f.   | n.f. | n.f.  | n.f. | n.f.  | n.f. |
| Esp1p      | n.f.  | n.f. | 3.20   | 2    | n.f.  | n.f. | n.f.   | n.f. | 5.19   | 4    | n.f.   | n.f. | n.f.  | n.f. | n.f.  | n.f. |
| Exg1p      | 35.36 | 15   | 62.24  | 11   | 21.07 | 7    | 109.86 | 10   | 150.86 | 23   | 136.97 | 19   | 35.07 | 15   | 53.57 | 11   |
| Exg2p      | n.f.  | n.f. | 5.17   | 2    | n.f.  | n.f. | n.f.   | n.f. | 7.80   | 3    | 7.95   | 2    | n.f.  | n.f. | n.f.  | n.f. |
| Fra1p      | 2.13  | 2    | n.f.   | n.f. | n.f.  | n.f. | n.f.   | n.f. | 8.29   | 3    | n.f.   | n.f. | n.f.  | n.f. | n.f.  | n.f. |
| Lap2p      | n.f.  | n.f. | 7.54   | 2    | n.f.  | n.f. | n.f.   | n.f. | 23.48  | 10   | 12.30  | 5    | n.f.  | n.f. | n.f.  | n.f. |

|         |       |      |       |      |       |      |        |      |        |    |        |      |       |      |       |      |
|---------|-------|------|-------|------|-------|------|--------|------|--------|----|--------|------|-------|------|-------|------|
| Lap3p   | n.f.  | n.f. | 14.71 | 5    | n.f.  | n.f. | n.f.   | n.f. | 55.28  | 14 | 18.38  | 5    | n.f.  | n.f. | n.f.  | n.f. |
| Map1p   | 10.02 | 5    | n.f.  | n.f. | n.f.  | n.f. | n.f.   | n.f. | 90.10  | 16 | 130.70 | 22   | n.f.  | n.f. | n.f.  | n.f. |
| Mas1p   | n.f.  | n.f. | 28.04 | 5    | n.f.  | n.f. | n.f.   | n.f. | 3.52   | 3  | 12.98  | 6    | n.f.  | n.f. | n.f.  | n.f. |
| Mas2p   | n.f.  | n.f. | 7.38  | 4    | n.f.  | n.f. | n.f.   | n.f. | 8.97   | 4  | 8.69   | 3    | n.f.  | n.f. | 8.02  | 3    |
| Mca1p   | n.f.  | n.f. | n.f.  | n.f. | 17.16 | 3    | n.f.   | n.f. | 14.00  | 4  | 8.09   | 4    | 3.63  | 4    | n.f.  | n.f. |
| Nma111p | n.f.  | n.f. | 4.60  | 4    | n.f.  | n.f. | n.f.   | n.f. | 8.58   | 5  | n.f.   | n.f. | n.f.  | n.f. | n.f.  | n.f. |
| Otu1p   | n.f.  | n.f. | n.f.  | n.f. | n.f.  | n.f. | n.f.   | n.f. | 19.44  | 4  | 4.94   | 2    | n.f.  | n.f. | n.f.  | n.f. |
| Pep4p   | 74.02 | 16   | 96.80 | 14   | 25.46 | 12   | 112.56 | 12   | 152.69 | 18 | 228.73 | 21   | 28.19 | 16   | 52.27 | 12   |
| Pim1p   | n.f.  | n.f. | n.f.  | n.f. | n.f.  | n.f. | n.f.   | n.f. | 37.21  | 11 | 13.15  | 4    | n.f.  | n.f. | n.f.  | n.f. |
| Prb1p   | 27.06 | 8    | 26.64 | 8    | 64.6  | 8    | 8.37   | 2    | 78.04  | 12 | 46.67  | 11   | 21.6  | 10   | 4.65  | 2    |
| Prc1p   | 13.79 | 6    | 68.39 | 9    | n.f.  | n.f. | 45.54  | 9    | 96.61  | 15 | 87.29  | 11   | n.f.  | n.f. | 35.98 | 10   |
| Prd1p   | 11.13 | 6    | 16.48 | 5    | n.f.  | n.f. | n.f.   | n.f. | 75.51  | 24 | 15.75  | 6    | n.f.  | n.f. | n.f.  | n.f. |
| Pre10p  | n.f.  | n.f. | 10.05 | 5    | n.f.  | n.f. | n.f.   | n.f. | 29.01  | 5  | n.f.   | n.f. | n.f.  | n.f. | n.f.  | n.f. |
| Pre1p   | n.f.  | n.f. | n.f.  | n.f. | n.f.  | n.f. | n.f.   | n.f. | 18.60  | 5  | 8.40   | 3    | n.f.  | n.f. | n.f.  | n.f. |
| Pre2p   | n.f.  | n.f. | n.f.  | n.f. | n.f.  | n.f. | n.f.   | n.f. | 20.51  | 7  | n.f.   | n.f. | n.f.  | n.f. | n.f.  | n.f. |
| Pre3p   | 9.11  | 5    | 36.58 | 6    | 8.8   | 3    | n.f.   | n.f. | 27.66  | 9  | 18.59  | 8    | n.f.  | n.f. | 6.66  | 2    |
| Pre4p   | n.f.  | n.f. | 7.66  | 2    | n.f.  | n.f. | n.f.   | n.f. | 12.47  | 5  | 3.75   | 2    | n.f.  | n.f. | n.f.  | n.f. |
| Pre5p   | 7.02  | 4    | 15.77 | 3    | n.f.  | n.f. | n.f.   | n.f. | 47.73  | 13 | 13.26  | 4    | n.f.  | n.f. | n.f.  | n.f. |
| Pre6p   | n.f.  | n.f. | 23.96 | 3    | 15.06 | 3    | n.f.   | n.f. | 71.41  | 11 | 26.74  | 5    | n.f.  | n.f. | n.f.  | n.f. |
| Pre7p   | n.f.  | n.f. | n.f.  | n.f. | 21.12 | 6    | n.f.   | n.f. | 22.51  | 6  | 5.81   | 3    | n.f.  | n.f. | n.f.  | n.f. |
| Pre8p   | 5.01  | 4    | 9.20  | 3    | 10.52 | 5    | n.f.   | n.f. | 31.27  | 10 | 26.42  | 9    | 4.22  | 4    | n.f.  | n.f. |
| Pre9p   | 16.67 | 8    | 31.21 | 7    | 6.2   | 3    | n.f.   | n.f. | 40.88  | 13 | 38.38  | 12   | 3.07  | 2    | n.f.  | n.f. |
| Pup1p   | n.f.  | n.f. | n.f.  | n.f. | n.f.  | n.f. | n.f.   | n.f. | 18.24  | 4  | 20.63  | 3    | n.f.  | n.f. | n.f.  | n.f. |
| Pup2p   | 30.98 | 12   | 24.13 | 7    | n.f.  | n.f. | n.f.   | n.f. | 77.71  | 16 | 122.73 | 15   | 2.13  | 3    | n.f.  | n.f. |
| Pup3p   | 8.34  | 3    | 9.58  | 2    | n.f.  | n.f. | n.f.   | n.f. | 33.25  | 8  | 21.06  | 5    | n.f.  | n.f. | n.f.  | n.f. |
| Rad2p   | n.f.  | n.f. | n.f.  | n.f. | n.f.  | n.f. | n.f.   | n.f. | 2.09   | 2  | n.f.   | n.f. | n.f.  | n.f. | n.f.  | n.f. |
| Rai1p   | n.f.  | n.f. | n.f.  | n.f. | n.f.  | n.f. | n.f.   | n.f. | 2.53   | 2  | n.f.   | n.f. | n.f.  | n.f. | n.f.  | n.f. |
| Rex2p   | n.f.  | n.f. | n.f.  | n.f. | n.f.  | n.f. | n.f.   | n.f. | 9.70   | 3  | n.f.   | n.f. | n.f.  | n.f. | n.f.  | n.f. |

|          |       |      |        |      |       |      |      |      |        |      |        |      |        |      |       |      |
|----------|-------|------|--------|------|-------|------|------|------|--------|------|--------|------|--------|------|-------|------|
| Rny1p    | n.f.  | n.f. | n.f.   | n.f. | 18.58 | 6    | n.f. | n.f. | 6.84   | 3    | 9.82   | 2    | 18.65  | 5    | n.f.  | n.f. |
| Rpn11p   | n.f.  | n.f. | n.f.   | n.f. | 7.23  | 2    | n.f. | n.f. | 22.27  | 9    | n.f.   | n.f. | n.f.   | n.f. | n.f.  | n.f. |
| Scl1p    | 3.78  | 3    | 13.62  | 3    | n.f.  | n.f. | n.f. | n.f. | 40.67  | 12   | 21.68  | 5    | n.f.   | n.f. | 5.14  | 2    |
| Scw11p   | n.f.  | n.f. | n.f.   | n.f. | n.f.  | n.f. | n.f. | n.f. | 5.61   | 2    | 6.19   | 2    | n.f.   | n.f. | n.f.  | n.f. |
| Sga1p    | n.f.  | n.f. | n.f.   | n.f. | n.f.  | n.f. | n.f. | n.f. | n.f.   | n.f. | 10.75  | 3    | n.f.   | n.f. | n.f.  | n.f. |
| Ste23p   | n.f.  | n.f. | n.f.   | n.f. | n.f.  | n.f. | n.f. | n.f. | 5.93   | 4    | 2.81   | 2    | n.f.   | n.f. | n.f.  | n.f. |
| Ste24p   | n.f.  | n.f. | 3.08   | 2    | n.f.  | n.f. | n.f. | n.f. | n.f.   | n.f. | n.f.   | n.f. | n.f.   | n.f. | n.f.  | n.f. |
| Ubp12p   | n.f.  | n.f. | n.f.   | n.f. | n.f.  | n.f. | n.f. | n.f. | 29.97  | 11   | 8.68   | 3    | n.f.   | n.f. | n.f.  | n.f. |
| Ubp14p   | n.f.  | n.f. | n.f.   | n.f. | n.f.  | n.f. | n.f. | n.f. | 8.45   | 4    | n.f.   | n.f. | n.f.   | n.f. | n.f.  | n.f. |
| Ubp15p   | n.f.  | n.f. | n.f.   | n.f. | n.f.  | n.f. | n.f. | n.f. | 52.17  | 19   | 6.92   | 4    | n.f.   | n.f. | n.f.  | n.f. |
| Ubp1p    | n.f.  | n.f. | n.f.   | n.f. | n.f.  | n.f. | n.f. | n.f. | n.f.   | n.f. | 4.42   | 2    | n.f.   | n.f. | n.f.  | n.f. |
| Ubp2p    | n.f.  | n.f. | n.f.   | n.f. | n.f.  | n.f. | n.f. | n.f. | 16.11  | 8    | 2.21   | 4    | n.f.   | n.f. | n.f.  | n.f. |
| Ubp3p    | n.f.  | n.f. | n.f.   | n.f. | n.f.  | n.f. | n.f. | n.f. | 14.46  | 5    | n.f.   | n.f. | n.f.   | n.f. | n.f.  | n.f. |
| Ubp6p    | n.f.  | n.f. | 4.67   | 2    | n.f.  | n.f. | n.f. | n.f. | 26.57  | 10   | n.f.   | n.f. | n.f.   | n.f. | n.f.  | n.f. |
| Ubp7p    | n.f.  | n.f. | n.f.   | n.f. | n.f.  | n.f. | n.f. | n.f. | 2.72   | 2    | n.f.   | n.f. | n.f.   | n.f. | n.f.  | n.f. |
| Ulp2p    | n.f.  | n.f. | n.f.   | n.f. | n.f.  | n.f. | n.f. | n.f. | 3.42   | 2    | n.f.   | n.f. | n.f.   | n.f. | n.f.  | n.f. |
| Vma1p    | 72.83 | 36   | 602.63 | 51   | 269.1 | 49   | n.f. | n.f. | 309.81 | 70   | 276.22 | 58   | 145.55 | 35   | 14.78 | 4    |
| Xrn1p    | n.f.  | n.f. | n.f.   | n.f. | n.f.  | n.f. | n.f. | n.f. | 2.48   | 2    | n.f.   | n.f. | n.f.   | n.f. | n.f.  | n.f. |
| Ybl055cp | n.f.  | n.f. | 2.41   | 2    | n.f.  | n.f. | n.f. | n.f. | n.f.   | n.f. | n.f.   | n.f. | n.f.   | n.f. | n.f.  | n.f. |
| Ybr139wp | n.f.  | n.f. | 10.93  | 2    | n.f.  | n.f. | n.f. | n.f. | 21.02  | 6    | 6.37   | 2    | n.f.   | n.f. | n.f.  | n.f. |
| Yil108wp | n.f.  | n.f. | n.f.   | n.f. | n.f.  | n.f. | n.f. | n.f. | 6.14   | 3    | n.f.   | n.f. | n.f.   | n.f. | n.f.  | n.f. |
| Yol057wp | n.f.  | n.f. | n.f.   | n.f. | n.f.  | n.f. | n.f. | n.f. | 21.44  | 10   | n.f.   | n.f. | n.f.   | n.f. | n.f.  | n.f. |
| Yps1p    | n.f.  | n.f. | n.f.   | n.f. | n.f.  | n.f. | n.f. | n.f. | 5.42   | 2    | n.f.   | n.f. | n.f.   | n.f. | n.f.  | n.f. |
| Yps3p    | n.f.  | n.f. | n.f.   | n.f. | n.f.  | n.f. | n.f. | n.f. | 2.87   | 2    | n.f.   | n.f. | n.f.   | n.f. | n.f.  | n.f. |
| Yps7p    | n.f.  | n.f. | n.f.   | n.f. | n.f.  | n.f. | n.f. | n.f. | 7.37   | 4    | n.f.   | n.f. | n.f.   | n.f. | n.f.  | n.f. |
| Yta12p   | n.f.  | n.f. | n.f.   | n.f. | n.f.  | n.f. | n.f. | n.f. | n.f.   | n.f. | 2.47   | 2    | n.f.   | n.f. | n.f.  | n.f. |
| Yuh1p    | 3.85  | 3    | n.f.   | n.f. | n.f.  | n.f. | n.f. | n.f. | 24.14  | 6    | 18.43  | 4    | n.f.   | n.f. | n.f.  | n.f. |
